# Supplementary material
Source: PubMed Central journal article supplement (PMC3411963)
Supplement: 1202881109_pnas.201202881SI.pdf [file 1202881109_pnas.201202881SI.pdf]

# Supporting Information

Scarborough et al. 10.1073/pnas.1202881109

## SI Discussion

Stable carbon isotope values from reservoir sediments provide evidence of vegetation in the watersheds. For example, high  $\delta^{13}\text{C}$  values suggest enrichment from plants with C4 (e.g., maize and other tropical grasses) or crassulacean acid metabolism (CAM) (e.g., cactus and other succulents) photosynthetic pathways. The highest mean stable carbon isotope values were found in sediments from Inscription and Terminos ( $-21.6$ ), and the lowest values were from Vaca del Monte ( $-27.5$ ). The highest  $\delta^{13}\text{C}$  values were found in Terminos sediments from Late Preclassic to Early Postclassic strata containing pollen

from maize and Steraceae, Poaceae, Polygonaceae, and Solanaceae weeds. Terminos is located near a Maya age settlement with agricultural terraces and associated archaeological evidence for agriculture, disturbance, and clearing. These findings are comparable with those findings in the works by Beach et al. (1), Johnson et al. (2), Webb et al. (3), and Wright et al. (4). The nitrogen content of the sediments was extremely low, making it impossible to obtain nitrogen isotopic data. The extremely low nitrogen content suggests a relative absence of algal blooms, which may have resulted from a limited amount of human waste contamination (5–7).

1. Beach T, et al. (2011) Carbon isotopic ratios of wetland and terrace soil sequences in the Maya lowlands of Belize and Guatemala. *Catena Suppl* 85:109–118.
2. Johnson K, Wright DR, Terry R (2007) Application of carbon isotope analysis to ancient maize agriculture in the Peten Region of Guatemala. *Geoarchaeol Int J* 22:313–336.
3. Webb E, et al. (2007) Stable carbon isotopes signature of ancient maize agriculture in the soils of Motul De San Jose, Guatemala. *Geoarchaeol Int J* 22:291–312.
4. Wright DR, Terry R, Eberl M (2009) Soil properties and stable carbon isotope analysis of landscape features in the Petexbatun region of Guatemala. *Geoarchaeol Int J* 24: 466–491.
5. Angradi TR (1993) Stable carbon and nitrogen isotope analysis of seston in a regulated Rocky Mountain river, USA. *Regul Rivers Res Manage* 8:251–270.
6. Bratkic A, Sturm M, Faganeli J, Ogrinc N (2012) Semi-annual carbon and nitrogen isotope variations in the water column of Lake Bled, NW Slovenia. *Biogeosciences* 9: 1–11.
7. Kaushal SS, Lewis WM, Jr., McCutchan JH, Jr. (2006) Land use change and nitrogen enrichment of a Rocky Mountain watershed. *Ecol Appl* 16:299–312.

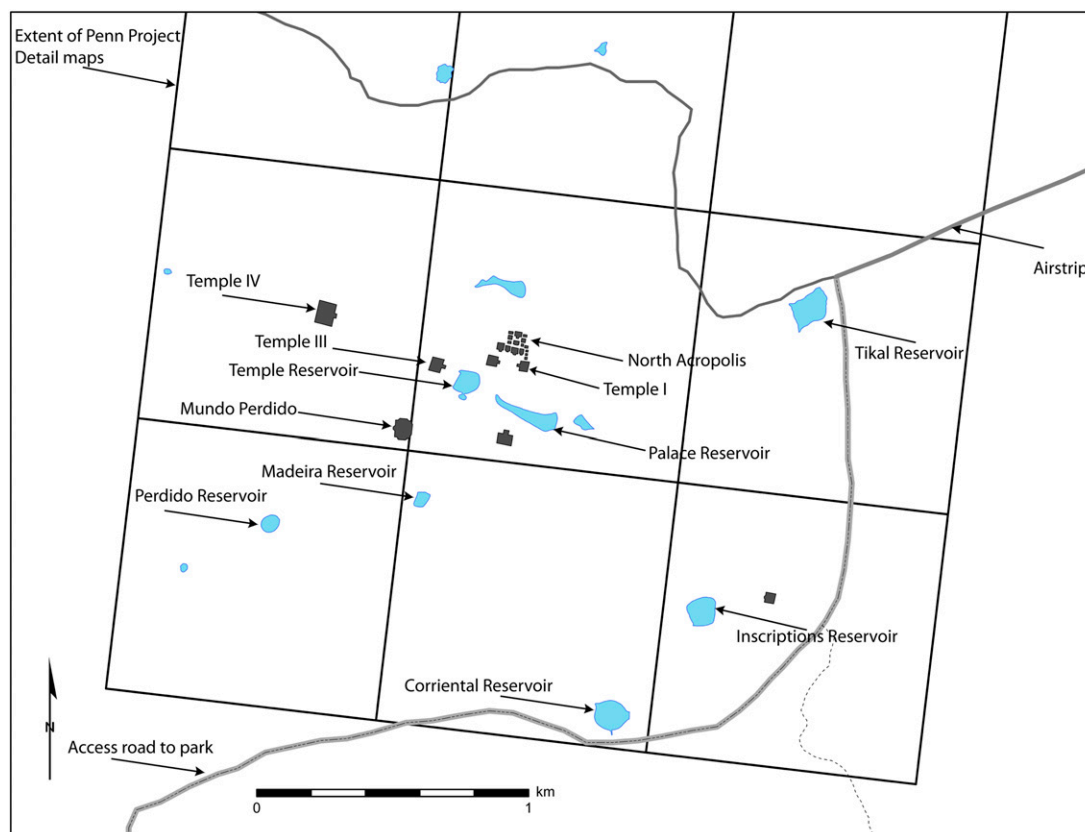

**Fig. S1.** Central Tikal layout showing key temples and reservoirs. The road into and out of the Park along with the University of Pennsylvania Project airstrip are also indicated. Throughout our project, the University of Pennsylvania maps of Central Tikal, Tikal Report #11 (1) are used as base maps. The extent of the nine University of Pennsylvania, Penn Project, detail maps is shown. The work reported here is primarily in Temple, Palace, and Corriental Reservoirs. We also worked extensively in Perdido Reservoir and along the East Brecha.

1. Carr RF, Hazard JE (1961) *Map of the Ruins of Tikal, El Peten, Guatemala* (University Museum, University of Pennsylvania, Philadelphia).



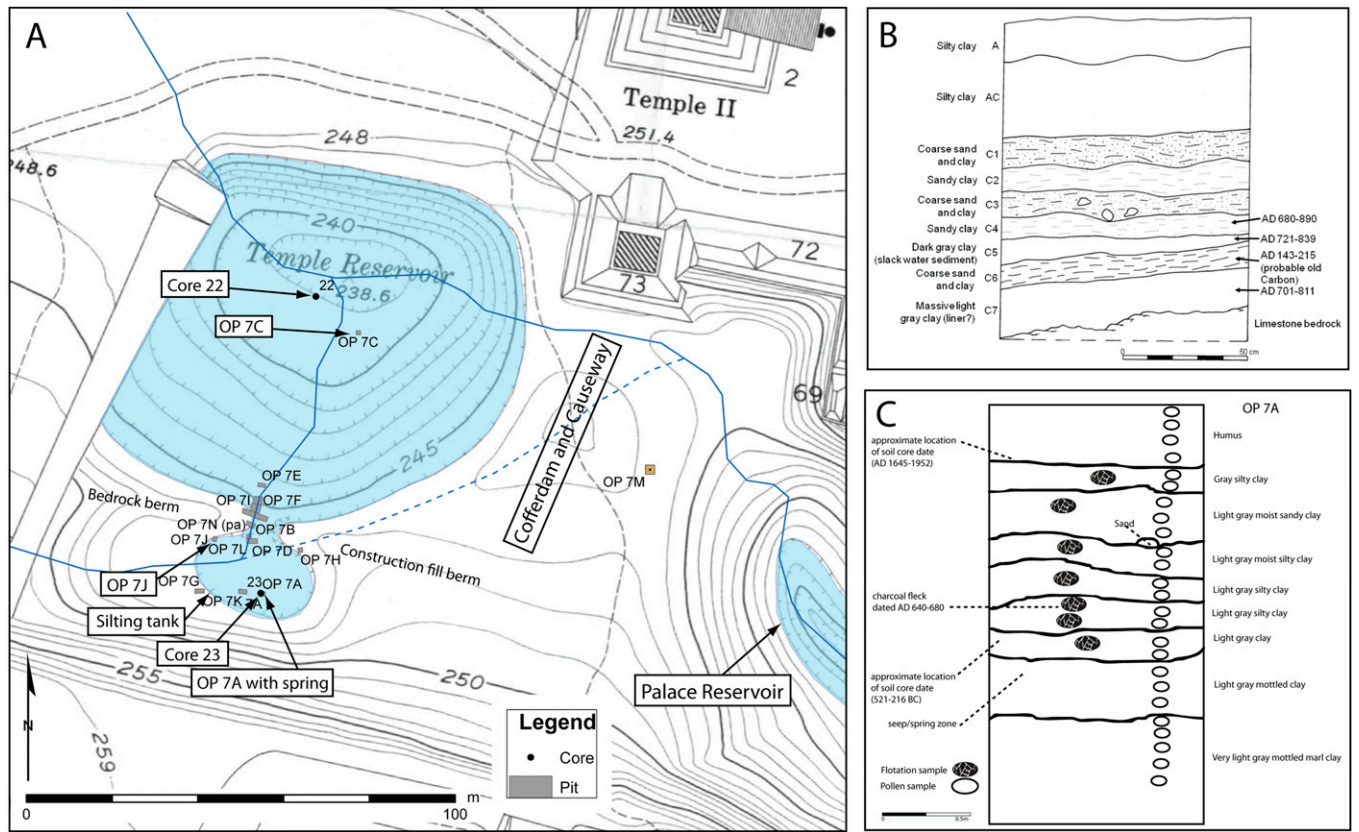

**Fig. S3.** Our excavations and pit profiles in the Temple Reservoir area. (A) Detail of Temple Reservoir with excavation pits (operations), cores, and subterranean spring exposure at pit OP 7A in the silting tank. The cofferdam, which forms Temple Reservoir and isolates it from Palace Reservoir, is indicated. The western and northern margins of the ancient arroyo were identified and found to have been partially quarried back. The berm separating the silting tank from the main tank was divided to the east and west by a narrow spillway. Excavations showed that the western berm was contoured bedrock but that the eastern berm was introduced through consolidated fill. We conclude that the western berm is the remains of the northern bank of the winding arroyo head, and the eastern berm represents fill redeposited into the original arroyo to form the constriction necessary for controlling water debouching from the deliberately hollowed silting tank feature. Water worn cobbles were identified at the silting tank's far northwestern margins in OP 7J. Here and on the other maps, our operations were located with Total Station and global positioning systems. The resulting positions were plotted on georeferenced versions of the Penn Project maps. The base map is courtesy of the Penn Museum. (B) Temple Reservoir main tank Profile OP 7C with four dates. The C7 clay layer may be a lining for the reservoir. Sand is present in multiple layers, likely washed out of a sand filtration box at the reservoir inlet periodically. (C) Temple Reservoir silting tank profile OP 7A with three dates (Table S1) from adjacent core 23 superimposed. Pollen and botanical remains were highly degraded here as well as elsewhere in our Central Tikal Reservoir sample. The zone of the spring seepage, under our earliest date, is shown.









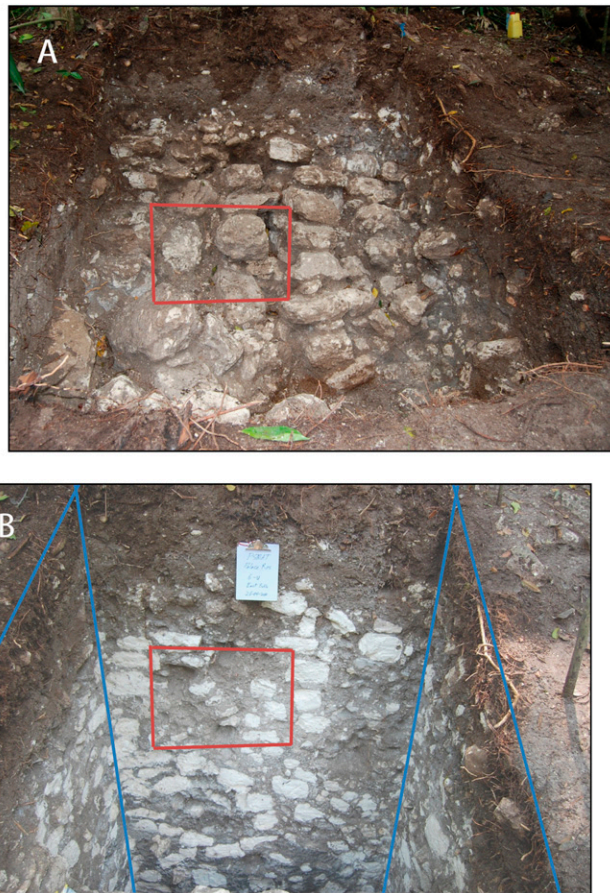

**Fig. 56.** Palace Dam excavations at sluice gate. (A) Veneer stones of dam on initial exposure in unit OP 6U. The postulated sluice, outlined in red, is now filled with the slump-down debris. (B) Continued excavation in exposure OP 6U. The collapsed sluice in the east exposure of the dam wall is exposed and outlined in red.

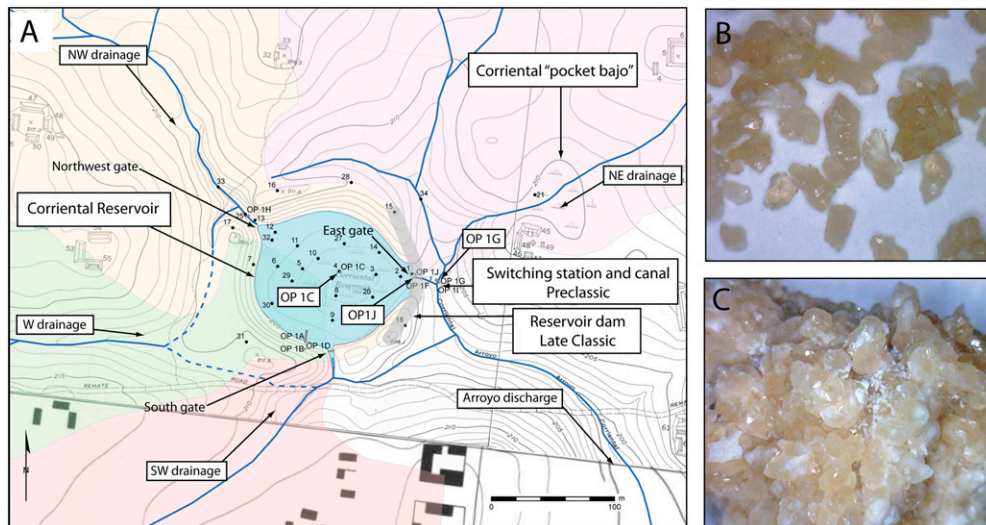

**Fig. 57.** The Corriental Reservoir area. (A) The main drainages leading to Corriental Reservoir—northwest, southwest, and northeast drainage—and the main drainage leading away from the reservoir, Corriental Arroyo. We postulate a switching station in Late Preclassic times (predam) to divert water from the northeast drainage—alternately into the incipient reservoir or directly into Arroyo Corriental. We and others postulate that the ancient Maya constructed a dam at this reservoir discharge as indicated by Reservoir Dam, Late Classic at a later date. The water level shown, 205 m elevation (ref. 1, p. 24), assumes this dam is in place. The work by Carr and Hazard (ref. 1, p. 14) also suggests another switching station shunt at the south entrance to Corriental Reservoir to direct water into or around the reservoir. The base map is courtesy of the Penn Museum. (B) Sand-sized authigenic quartz crystals taken from sand lensing within the Corriental Reservoir used for posited water filtration. (C) Soft, not fully solidified sandstone bedrock composed of authigenic quartz crystals located ~30 km from Tikal and source material for photomicrograph B. We know of no other potential sand sources within this 30-km radius.

1. Carr RF, Hazard JE (1961) *Map of the Ruins of Tikal, El Peten, Guatemala* (University Museum, University of Pennsylvania, Philadelphia).

**Table S1. Chronostratigraphic data for Maya reservoirs and related contexts at Tikal, Guatemala, including AMS radiocarbon sample composition, provenience, stable carbon isotope analyses, context, measured radiocarbon years B.P., calibrated age at  $2\sigma$ , and cultural period**

| Laboratory number            | Composition | Sample provenience                          | $\delta^{13}\text{C}$ (‰) | Depth (cm)         | Measured $^{14}\text{C}$ (y B.P.) | Calibrated age ( $2\sigma$ ) | Cultural period                  |
|------------------------------|-------------|---------------------------------------------|---------------------------|--------------------|-----------------------------------|------------------------------|----------------------------------|
| 88676*                       | SOM         | Temple Silting Tank (Op 7, Core 23–2)       | –26.23                    | 70–80              | 195 ± 35                          | A.D. 1645–1952               | Postconquest                     |
| 88677*                       | SOM         | Temple Silting Tank (Op 7, Core 23–2)       | –22.3                     | 110–120            | 2,330 ± 40                        | 521–216 B.C.                 | Late to Middle Preclassic        |
| $\beta$ -298985 <sup>†</sup> | Charcoal    | Temple Silting Tank (Op 7A)                 | –25.6                     | 130                | 1,370 ± 30                        | A.D. 640–680                 | Late Classic                     |
| $\beta$ -281746 <sup>†</sup> | Charcoal    | Temple Main Tank (Op 7C)                    | –23.7                     | 110                | 1,200 ± 40                        | A.D. 680–890                 | Late Classic                     |
| 85584 <sup>†</sup>           | SOM         | Temple Main Tank (Op 7C)                    | –17.1                     | 130–140            | 1,230 ± 25                        | A.D. 721–839                 | Late Classic                     |
| 85585 <sup>†</sup>           | SOM         | Temple Main Tank                            | –20.4                     | 140–162            | 1,830 ± 25                        | A.D. 143–215                 | Late Preclassic to Early Classic |
| 85583 <sup>†</sup>           | SOM         | Temple Main Tank (Op 7C)                    | –22.8                     | 162–194            | 1,250 ± 35                        | A.D. 701–811                 | Late Classic                     |
| $\beta$ -281750 <sup>†</sup> | Charcoal    | Palace (Op 6Q)                              | –25.3                     | Above dam collapse | 1,250 ± 40                        | A.D. 670–880                 | Late Classic                     |
| $\beta$ -281751 <sup>†</sup> | Charcoal    | Palace (Op 6Q)                              | –24.7                     | Below dam collapse | 1,260 ± 40                        | A.D. 660–880                 | Late Classic                     |
| $\beta$ -288914 <sup>†</sup> | Charcoal    | Palace (Op 6L)                              | –25.2                     | 150 dam            | 1,380 ± 40                        | A.D. 610–680                 | Late Classic                     |
| $\beta$ -281749 <sup>†</sup> | Charcoal    | Palace (Op 6U)                              | –23.1                     | Dam fill           | 15,360 ± 50                       | 16860–16740 B.C.             | Prehabitation?                   |
| $\beta$ -281745 <sup>†</sup> | SOM         | Palace (Op 6O)                              | –19.0                     | Channel fill       | 3,310 ± 40                        | 1870–1850 B.C.               | Early Preclassic                 |
| 88638 <sup>†</sup>           | SOM         | Palace (Op 6J-13, Core 1–1)                 | –26.3                     | 50–60              | 3,360 ± 30                        | 1739–1535 B.C.               | Early Preclassic                 |
| 88682 <sup>†</sup>           | SOM         | Palace (Op 6J-13, Core 1–2)                 | –25.1                     | 100–110            | 2,150 ± 40                        | 358–55 B.C.                  | Late Preclassic                  |
| $\beta$ -258720 <sup>†</sup> | Charcoal    | Corriental (Op 1C)                          | –26.9                     | 65–80              | 990 ± 40                          | A.D. 1010–1170               | Early Postclassic                |
| $\beta$ -280839*             | SOM         | Corriental (Op 1L, Core 8)                  | –19.5                     | 140–180            | 2,010 ± 40                        | 340–30 B.C.                  | Late Preclassic                  |
| $\beta$ -266124 <sup>†</sup> | SOM         | Corriental (Op 1C)                          | –20.2                     | 162–194            | 2,110 ± 40                        | 190–80 B.C.                  | Late Preclassic                  |
| $\beta$ -280837*             | SOM         | Corriental (Op 1L, Core 8)                  | –20.3                     | 180–230            | 2,120 ± 40                        | 380–170 B.C.                 | Late Preclassic                  |
| $\beta$ -258721 <sup>†</sup> | SOM         | Corriental (Op 1C)                          | –19.1                     | 265–290            | 2,340 ± 40                        | 760–400 B.C.                 | Middle Preclassic                |
| $\beta$ -270566*             | SOM         | Corriental (Op 1L, Core 8)                  | –23.1                     | 310–312            | 8,960 ± 60                        | 8290–7970 B.C.               | Archaic                          |
| $\beta$ -266122 <sup>†</sup> | SOM         | Corriental Arroyo (Op 2A)                   | –18.8                     | 90 buried soil     | 2,110 ± 40                        | 190–80 B.C.                  | Late Preclassic                  |
| $\beta$ -274990*             | Charcoal    | Corriental Berm (Op 1L, Core 17)            | –23.7                     | Anthrosol          | 1,560 ± 40                        | A.D. 400–570                 | Early Classic                    |
| $\beta$ -266123 <sup>†</sup> | SOM         | Corriental Pocket Bajo 1 (Op 2B)            | –20.6                     | 60 buried soil     | 1,930 ± 40                        | 90 B.C. to A.D. 80           | Late Preclassic                  |
| 88675*                       | SOM         | Corriental Pocket Bajo 2 (Op 1L, Core 21–1) | –22.4                     | 50–60              | 6,250 ± 35                        | 5312–5076 B.C.               | Archaic                          |
| 88678*                       | SOM         | Inscription (Op 1L, Core 20–1)              | –21.5                     | 50–60              | 4,170 ± 35                        | 2884–2632 B.C.               | Early Preclassic                 |
| 88678*                       | SOM         | Inscription (Op 1L, Core 20–2)              | –21.8                     | 80–90              | 3,840 ± 40                        | 2462–2154 B.C.               | Early Preclassic                 |
| 88680*                       | SOM         | Inscription (Op 1L, Core 20–2)              | –21.7                     | 90–100             | 3,000 ± 65                        | 1410–1049 B.C.               | Early Preclassic                 |
| 88681*                       | SOM         | Inscription (Op 1L, Core 20–1)              | –27.2                     | 120–130            | 11,600 ± 100                      | 11761–11316 B.C.             | Prehabitation?                   |
| $\beta$ -281747 <sup>†</sup> | Charcoal    | Perdido (Op 8K)                             | –24.9                     | 49–54 ingress      | 6,810 ± 40                        | 5740–5640 B.C.               | Archaic                          |
| $\beta$ -289287*             | SOM         | Perdido (Op 8, Core N2E0)                   | –18.7                     | 50–60              | 2,220 ± 60                        | 390–180 B.C.                 | Late Preclassic                  |
| $\beta$ -280828 <sup>†</sup> | SOM         | Perdido (Op 8A)                             | –20.2                     | 110                | 1,540 ± 40                        | A.D. 350–540                 | Early Classic                    |
| $\beta$ -289286*             | SOM         | Perdido (Op 8, Core N2E0)                   | –20.8                     | 180–190            | 15,110 ± 60                       | 16860–16740 B.C.             | Prehabitation?                   |
| $\beta$ -289285*             | SOM         | Perdido (Op 8, Core N2E0)                   | –19.8                     | 280–290            | 15,480 ± 60                       | 16920–16780 B.C.             | Prehabitation?                   |
| $\beta$ -289284*             | SOM         | Perdido (Op 8, Core N2E0)                   | –18.8                     | 390–395            | 15,310 ± 6                        | 16820–16670 B.C.             | Prehabitation?                   |





**Table S2. Elemental Analyzer–Isotope Ratio Mass Spectrometer stable carbon isotope values for insoluble soil organic matter from the reservoirs of Tikal, Guatemala, with sample provenience, stratigraphic context, age approximation, and cultural period**

| $\delta^{13}\text{C}$ | Provenience              | Depth | $^{14}\text{C}$ (y B.P.) | Cultural period                           |
|-----------------------|--------------------------|-------|--------------------------|-------------------------------------------|
| –18.5                 | Corriental               | 145   | 2,010 ± 40               | Late Preclassic                           |
| –25.2                 | Corriental               | 155   | 2,010 ± 40               | Late Preclassic                           |
| –21.9                 | Corriental               | 165   | 2,010 ± 40               | Late Preclassic                           |
| –27.2                 | Corriental               | 175   | 2,010 ± 40               | Late Preclassic                           |
| –18.9                 | Corriental               | 185   | 2,110 ± 40               | Late Preclassic                           |
| –22.3                 | Average                  |       |                          |                                           |
| –21.9                 | Corriental Pocket Bajo 2 | 40    | <6,250 ± 35              | Archaic                                   |
| –22.8                 | Corriental Pocket Bajo 2 | 50    | 6,250 ± 35               | Archaic                                   |
| –19.4                 | Corriental Pocket Bajo 2 | 60    | 6,250 ± 35               | Archaic                                   |
| –22.9                 | Corriental Pocket Bajo 2 | 70    | >6,250 ± 35              | Archaic                                   |
| –21.5                 | Corriental Pocket Bajo 2 | 80    | >6,250 ± 35              | Archaic                                   |
| –21.7                 | Corriental Pocket Bajo 2 | 90    | >6,250 ± 35              | Archaic                                   |
| –22.5                 | Corriental Pocket Bajo 2 | 100   | >6,250 ± 35              | Archaic or earlier                        |
| –21.8                 | Average                  |       |                          |                                           |
| –20.2                 | Inscription              | 15    | 3,000 ± 65 to 4,170 ± 35 | Early Preclassic                          |
| –20.3                 | Inscription              | 25    | 3,000 ± 65 to 4,170 ± 35 | Early Preclassic                          |
| –20                   | Inscription              | 35    | 3,000 ± 65 to 4,170 ± 35 | Early Preclassic                          |
| –20                   | Inscription              | 45    | 3,000 ± 65 to 4,170 ± 35 | Early Preclassic                          |
| –19.8                 | Inscription              | 55    | 3,000 ± 65 to 4,170 ± 35 | Early Preclassic                          |
| –20.6                 | Inscription              | 65    | 3,000 ± 65 to 4,170 ± 35 | Early Preclassic                          |
| –20.4                 | Inscription              | 75    | 3,000 ± 65 to 4,170 ± 35 | Early Preclassic                          |
| –20.8                 | Inscription              | 85    | 3,000 ± 65 to 4,170 ± 35 | Early Preclassic                          |
| –20.7                 | Inscription              | 95    | 3,000 ± 65 to 4,170 ± 35 | Early Preclassic                          |
| –24.1                 | Inscription              | 105   | 3,000 ± 65 to 4,170 ± 35 | Early Preclassic                          |
| –25.7                 | Inscription              | 115   | 3,000 ± 65 to 4,170 ± 35 | Early Preclassic                          |
| –26                   | Inscription              | 125   | 11,600 ± 100             | Prehabitation?                            |
| –21.6                 | Average                  |       |                          |                                           |
| –20.3                 | Perdido                  | 10    | 2,220 ± 60               | Late Preclassic                           |
| –21.5                 | Perdido                  | 20    | 2,220 ± 60               | Late Preclassic                           |
| –20.6                 | Perdido                  | 30    | 2,220 ± 60               | Late Preclassic                           |
| –21.9                 | Perdido                  | 40    | 2,220 ± 60               | Late Preclassic                           |
| –20.7                 | Perdido                  | 50    | 2,220 ± 60               | Late Preclassic                           |
| –23.6                 | Perdido                  | 70    | 1,540 ± 40 to 2,220 ± 60 | Late Preclassic or after                  |
| –25.7                 | Perdido                  | 80    | 1,540 ± 40 to 2,220 ± 60 | Late Preclassic or after                  |
| –24.1                 | Perdido                  | 90    | 1,540 ± 40 to 2,220 ± 60 | Late Preclassic or after                  |
| –23.6                 | Perdido                  | 100   | 1,540 ± 40 to 2,220 ± 60 | Late Preclassic or after                  |
| –23.6                 | Perdido                  | 110   | 1,540 ± 40               | Late Preclassic or after                  |
| –25.9                 | Perdido                  | 120   | >1,540 ± 40              | Early Classic or before                   |
| –25.2                 | Perdido                  | 130   | >1,540 ± 40              | Early Classic or before                   |
| –25.4                 | Perdido                  | 140   | >1,540 ± 40              | Early Classic or before                   |
| –23.2                 | Average                  |       |                          |                                           |
| –28.1                 | Temple (Main Tank)       | 10    | <1,200 ± 40              | Late Classic or after                     |
| –26.9                 | Temple (Main Tank)       | 20    | <1,200 ± 40              | Late Classic or after                     |
| –26.8                 | Temple (Main Tank)       | 30    | <1,200 ± 40              | Late Classic or after                     |
| –25.1                 | Temple (Main Tank)       | 40    | <1,200 ± 40              | Late Classic or after                     |
| –24.2                 | Temple (Main Tank)       | 50    | <1,200 ± 40              | Late Classic or after                     |
| –23.2                 | Temple (Main Tank)       | 60    | <1,200 ± 40              | Late Classic or after                     |
| –25.7                 | Average                  |       |                          |                                           |
| –28.2                 | Temple (Silting Tank)    | 10    | <195 ± 35                | Postconquest or after                     |
| –27.7                 | Temple (Silting Tank)    | 20    | <195 ± 35                | Postconquest or after                     |
| –25.5                 | Temple (Silting Tank)    | 60    | <195 ± 35                | Postconquest or after                     |
| –28.9                 | Temple (Silting Tank)    | 70    | 195 ± 35                 | Postconquest or after                     |
| –27.5                 | Temple (Silting Tank)    | 80    | 195 ± 35                 | Postconquest or after                     |
| –24                   | Temple (Silting Tank)    | 90    | 1,370 ± 30 to 2,330 ± 40 | Late to Middle Preclassic to Late Classic |
| –23.7                 | Temple (Silting Tank)    | 100   | 1,370 ± 30 to 2,330 ± 40 | Late to Middle Preclassic to Late Classic |
| –22.8                 | Temple (Silting Tank)    | 110   | 1,370 ± 30 to 2,330 ± 40 | Late to Middle Preclassic to Late Classic |
| –23.4                 | Temple (Silting Tank)    | 120   | 1,370 ± 30 to 2,330 ± 40 | Late to Middle Preclassic to Late Classic |
| –25.7                 | Average                  |       |                          |                                           |
| –30                   | Terminos                 | 0     | <320 ± 40                | Postconquest                              |
| –29.2                 | Terminos                 | 5     | <320 ± 40                | Postconquest                              |
| –29.3                 | Terminos                 | 10    | <320 ± 40                | Postconquest                              |

**Table S2. Cont.**

| $\delta^{13}\text{C}$ | Provenience    | Depth           | $^{14}\text{C}$ (y B.P.) | Cultural period                      |
|-----------------------|----------------|-----------------|--------------------------|--------------------------------------|
| -28.2                 | Terminos       | 15              | 320 ± 40                 | Early Postclassic to Postconquest    |
| -27.1                 | Terminos       | 25              | 320 ± 40 to 950 ± 30     | Early Postclassic to Postconquest    |
| -27.5                 | Terminos       | 30              | 320 ± 40 to 950 ± 30     | Early Postclassic to Postconquest    |
| -26.6                 | Terminos       | 35              | 320 ± 40 to 950 ± 30     | Early Postclassic to Postconquest    |
| -25.9                 | Terminos       | 45              | 950 ± 30                 | Early Postclassic                    |
| -25.9                 | Terminos       | 50              | 950 ± 30 to 1,940 ± 40   | Late Preclassic to Early Postclassic |
| -25.3                 | Terminos       | 55              | 950 ± 30 to 1,940 ± 40   | Late Preclassic to Early Postclassic |
| -25.7                 | Terminos       | 60              | 950 ± 30 to 1,940 ± 40   | Late Preclassic to Early Postclassic |
| -26.2                 | Terminos       | 65              | 950 ± 30 to 1,940 ± 40   | Late Preclassic to Early Postclassic |
| -17.5*                | Terminos       | 75              | 950 ± 30 to 1,940 ± 40   | Late Preclassic to Early Postclassic |
| -18.8*                | Terminos       | 80              | 950 ± 30 to 1,940 ± 40   | Late Preclassic to Early Postclassic |
| -12.9*                | Terminos       | 90              | 1,940 ± 40               | Late Preclassic                      |
| -12.9*                | Terminos       | 95              | 1,940 ± 40               | Late Preclassic                      |
| -14.2*                | Terminos       | 100             | 1,940 ± 40               | Late Preclassic                      |
| -21.6                 | Average        |                 |                          |                                      |
| -28.6                 | Vaca del Monte | 1 <sup>†</sup>  | <400 ± 40                | Late Postclassic to Postconquest     |
| -28.4                 | Vaca del Monte | 7 <sup>†</sup>  | <400 ± 40                | Late Postclassic to Postconquest     |
| -28.3                 | Vaca del Monte | 13 <sup>†</sup> | <400 ± 40                | Late Postclassic to Postconquest     |
| -30.3                 | Vaca del Monte | 19 <sup>†</sup> | <400 ± 40                | Late Postclassic to Postconquest     |
| -26.6                 | Vaca del Monte | 25 <sup>†</sup> | <400 ± 40                | Late Postclassic to Postconquest     |
| -27.1                 | Vaca del Monte | 28 <sup>†</sup> | 400 ± 40 to 1,340 ± 40   | Late Classic to Postconquest         |
| -26.6                 | Vaca del Monte | 31 <sup>†</sup> | 400 ± 40 to 1,340 ± 40   | Late Classic to Postconquest         |
| -23.8                 | Vaca del Monte | 34 <sup>†</sup> | 400 ± 40 to 1,340 ± 40   | Late Classic to Postconquest         |
| -27.5                 | Average        |                 |                          |                                      |

Acetanilide was used as a C3 standard, and cornstarch was used as a C4 standard. Precision of standards at 1σ was 0.1425.

\*These strata contained pollen from Steraceae, Poaceae, Polygonaceae, and Solanaceae weeds associated with nearby agriculture, disturbance, and clearing. Maize pollen is also common. It is associated with nearby Maya age settlement, including agricultural terraces.

<sup>†</sup>Wet core; depth does not represent the actual stratum because of compression.
